# Supplementary material
Source: Springer Nature journal article supplement (https://www.springermedizin.de/resource/supplementary/13045_2011_165_MOESM1_ESM.pdf/9660792)

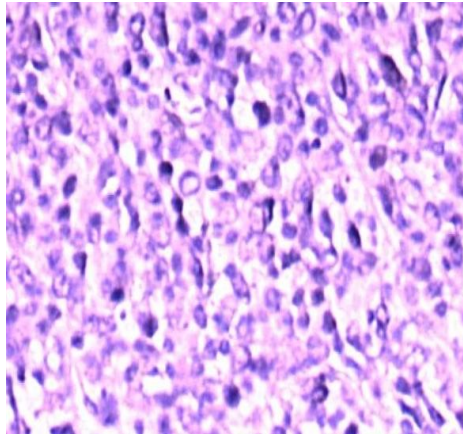

A

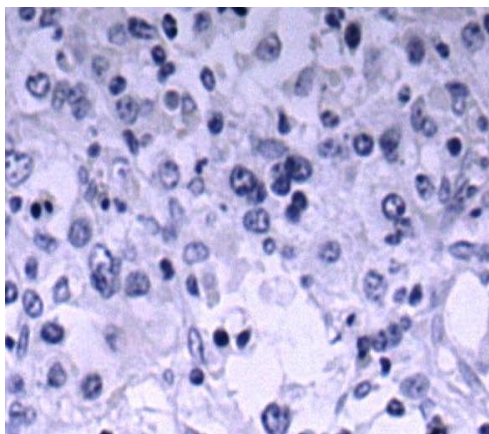

B

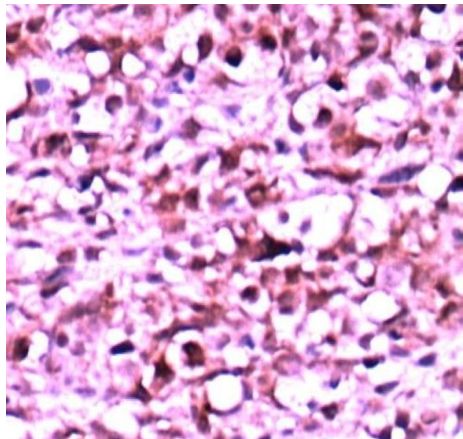

C

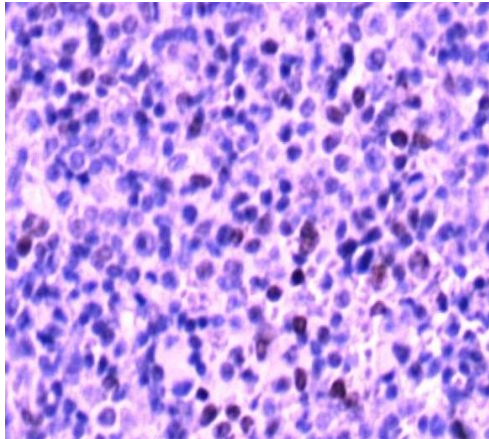

D

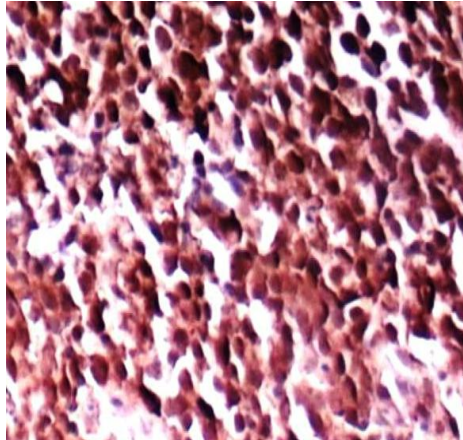

E

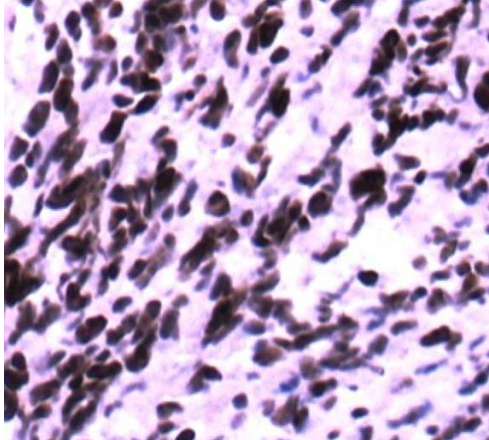

F

Supplement: MOESM1 [file 9660792]
